# Supplementary material for: The Effect of Globus Pallidus Interna Deep Brain Stimulation on a Dystonia Patient with the GNAL Mutation Compared to Patients with DYT1 and DYT6
Source: PubMed Central journal article supplement — J Mov Disord. 2019 May 30;12(2):120–4. doi: 10.14802/jmd.19006 (PMC6547035; doi:10.14802/jmd.19006), 2019-05-30
Supplement: jmd-19006-suppl.pdf [file jmd-19006-suppl.pdf]

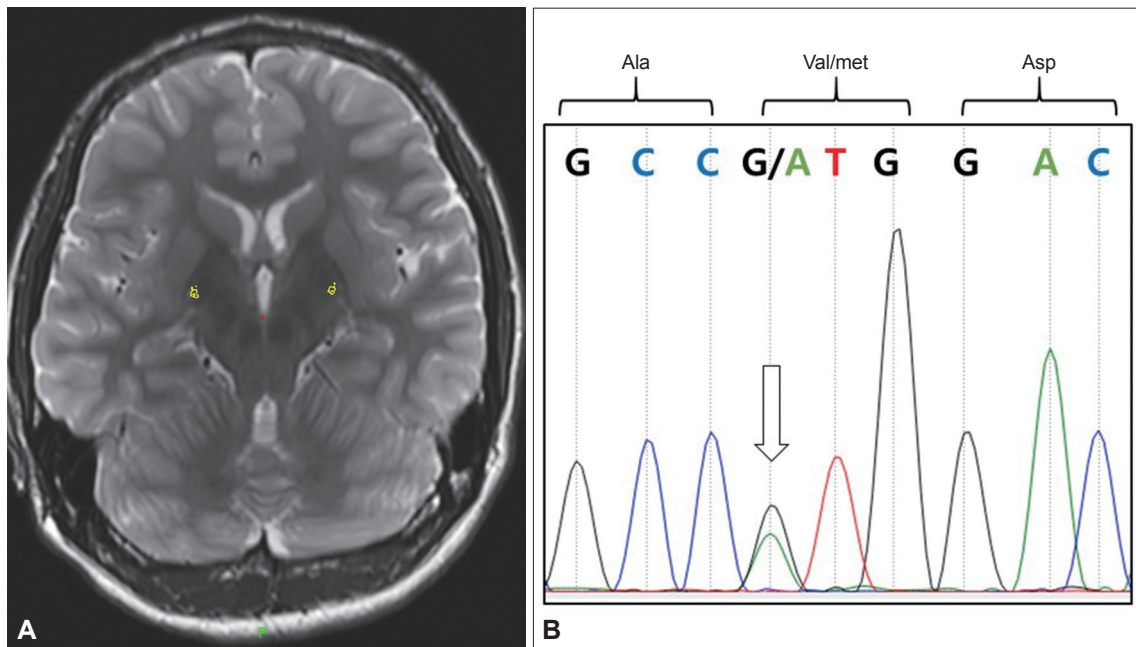

**Supplementary Figure 1.** A fusion image of the preoperative magnetic resonance image and a postoperative computed tomography image show deep brain stimulation electrodes located bilaterally on the globus pallidus (A). *GNAL* c.1060 G>A(p.Val354Met) (B).
